# Supplementary material
Source: PubMed Central journal article supplement (PMC4876972)

## Appendix

**Figure 1a: *Daily Trial*: Comparison of changes in napping for frequent (6x-per-week) vs. conventional (3x-per-week) in-center hemodialysis**

**Figure 1b: *Nocturnal Trial*: Comparison of changes in napping for frequent (6x-per-week) vs. conventional (3x-per-week) in-center hemodialysis**

**Figure 2a: *Daily Trial*: Comparison of changes in snoring for frequent (6x-per-week) vs. conventional (3x-per-week) in-center hemodialysis**

**Figure 2b: *Nocturnal Trial*: Comparison of changes in snoring for frequent (6x-per-week) vs. conventional (3x-per-week) in-center hemodialysis**

Percentages of nap levels at Baseline, F4 and F12 in Daily trial and 3x treatment

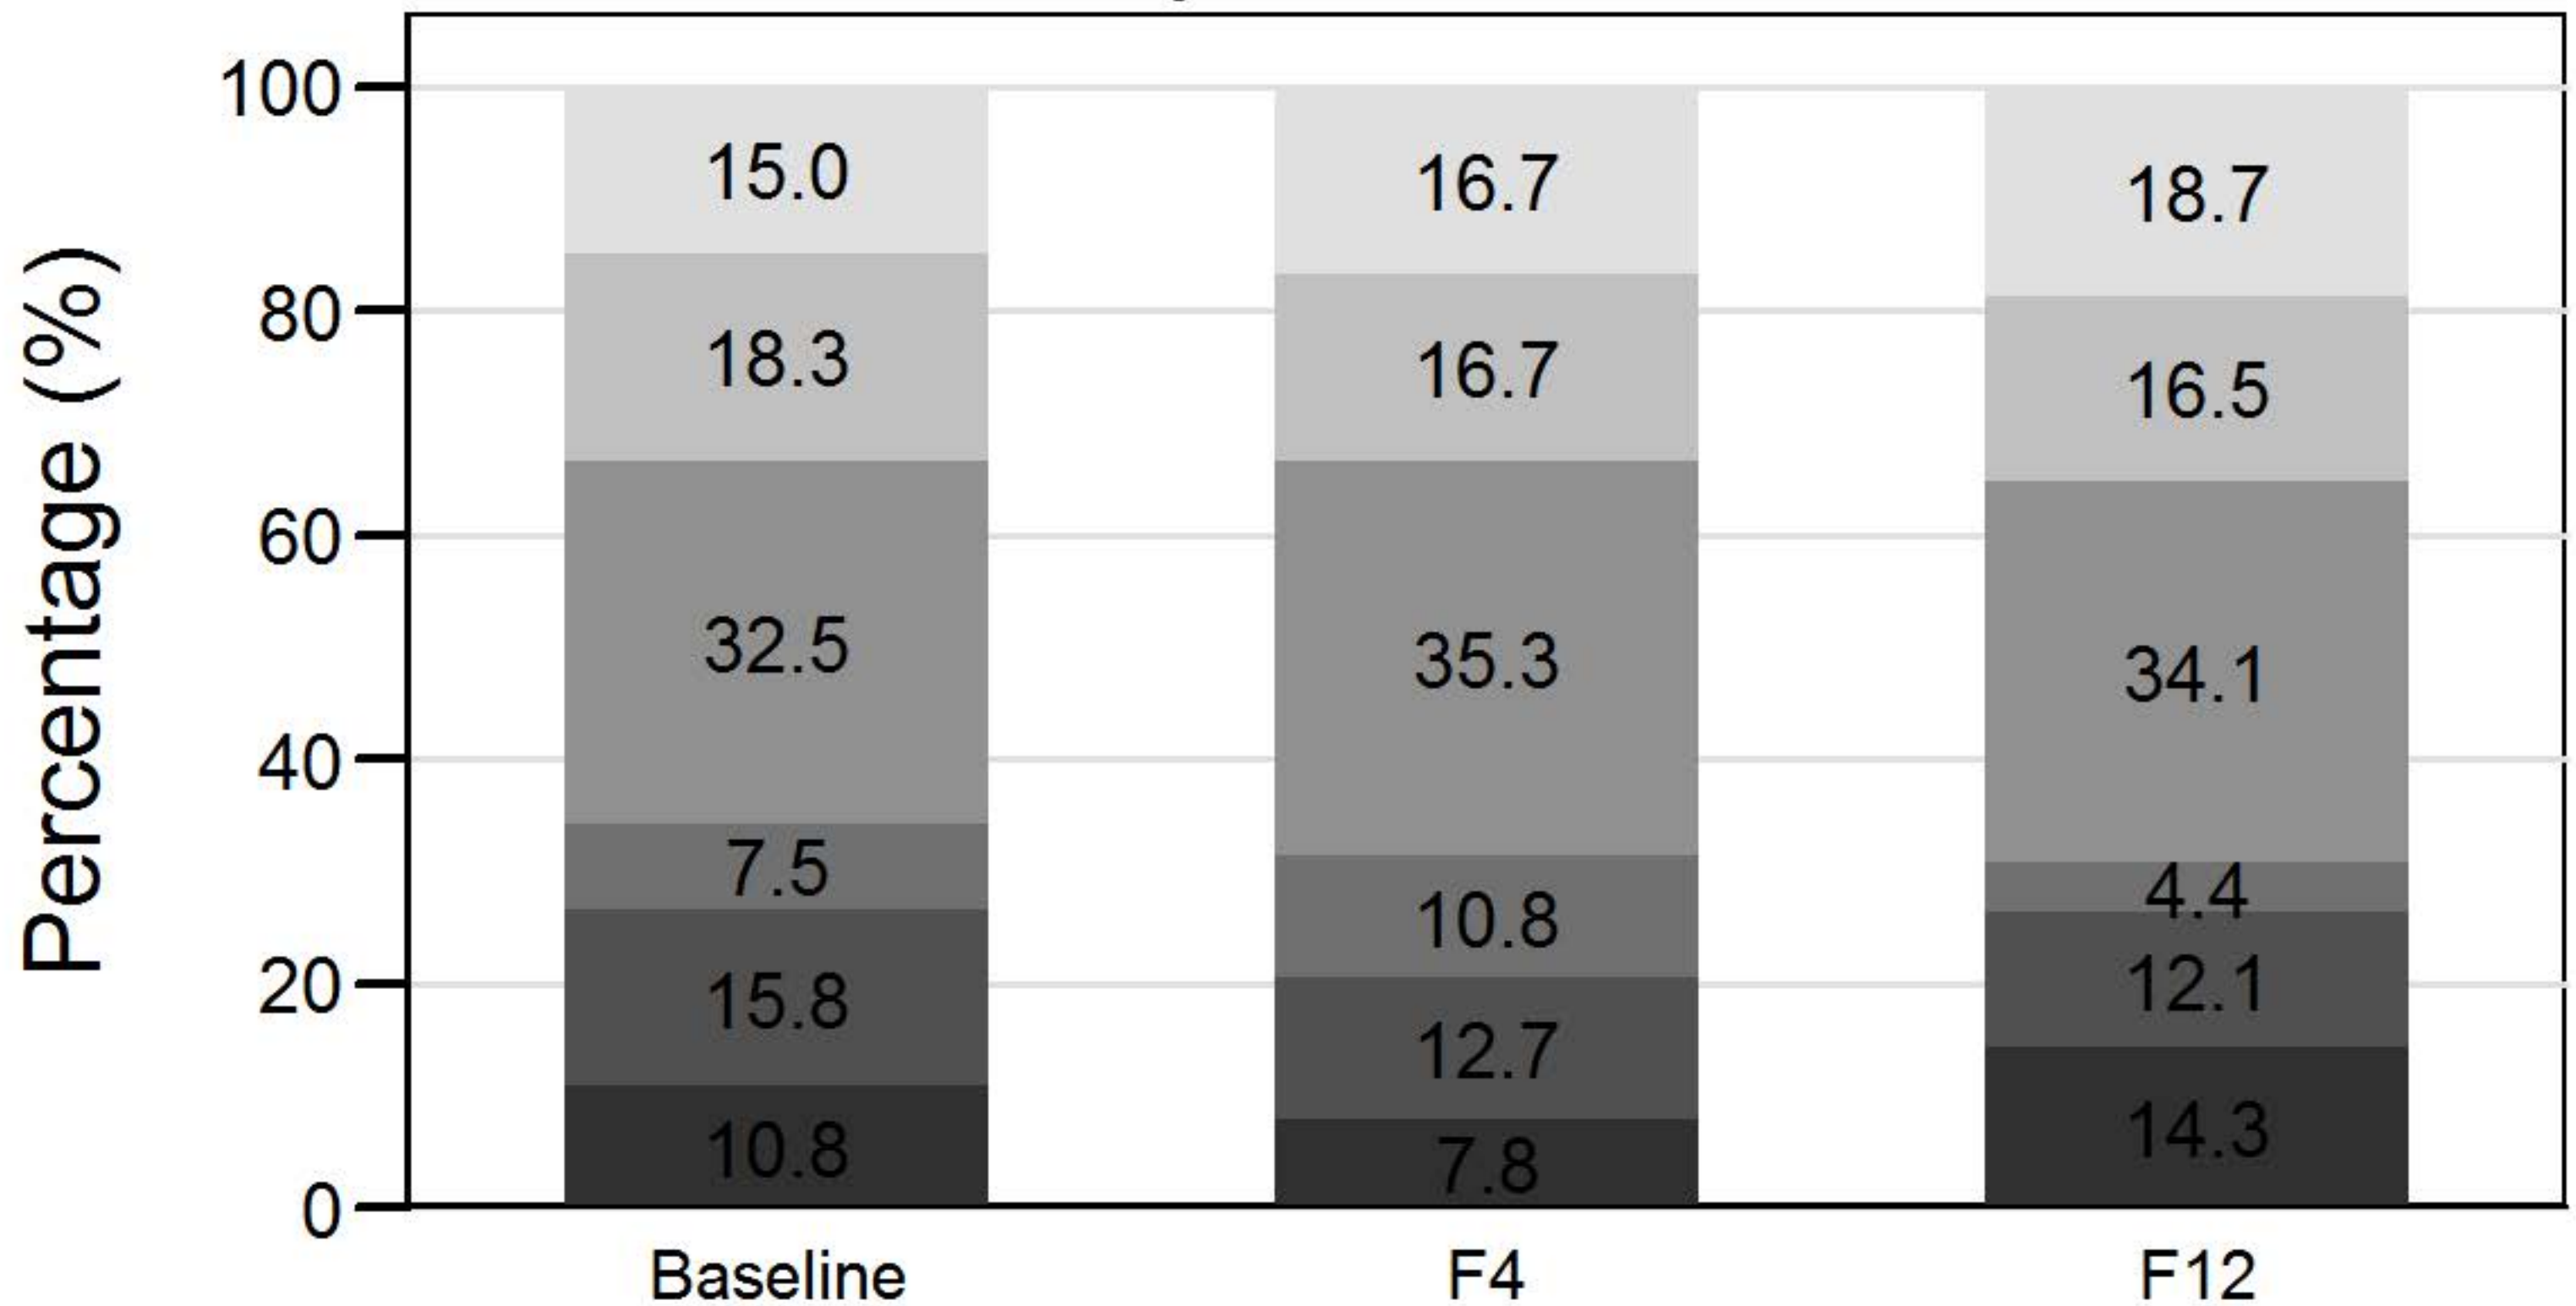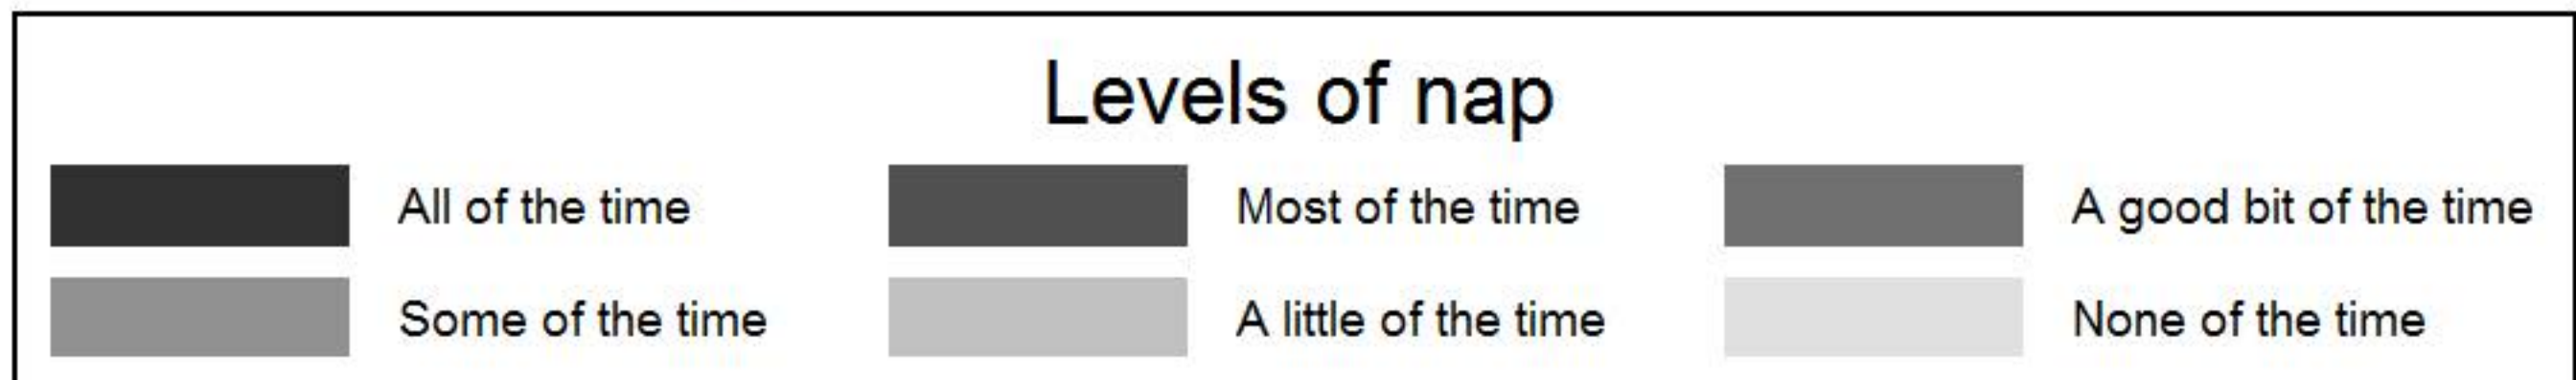

Percentages of nap levels at Baseline, F4 and F12  
in Daily trial and 6x treatment

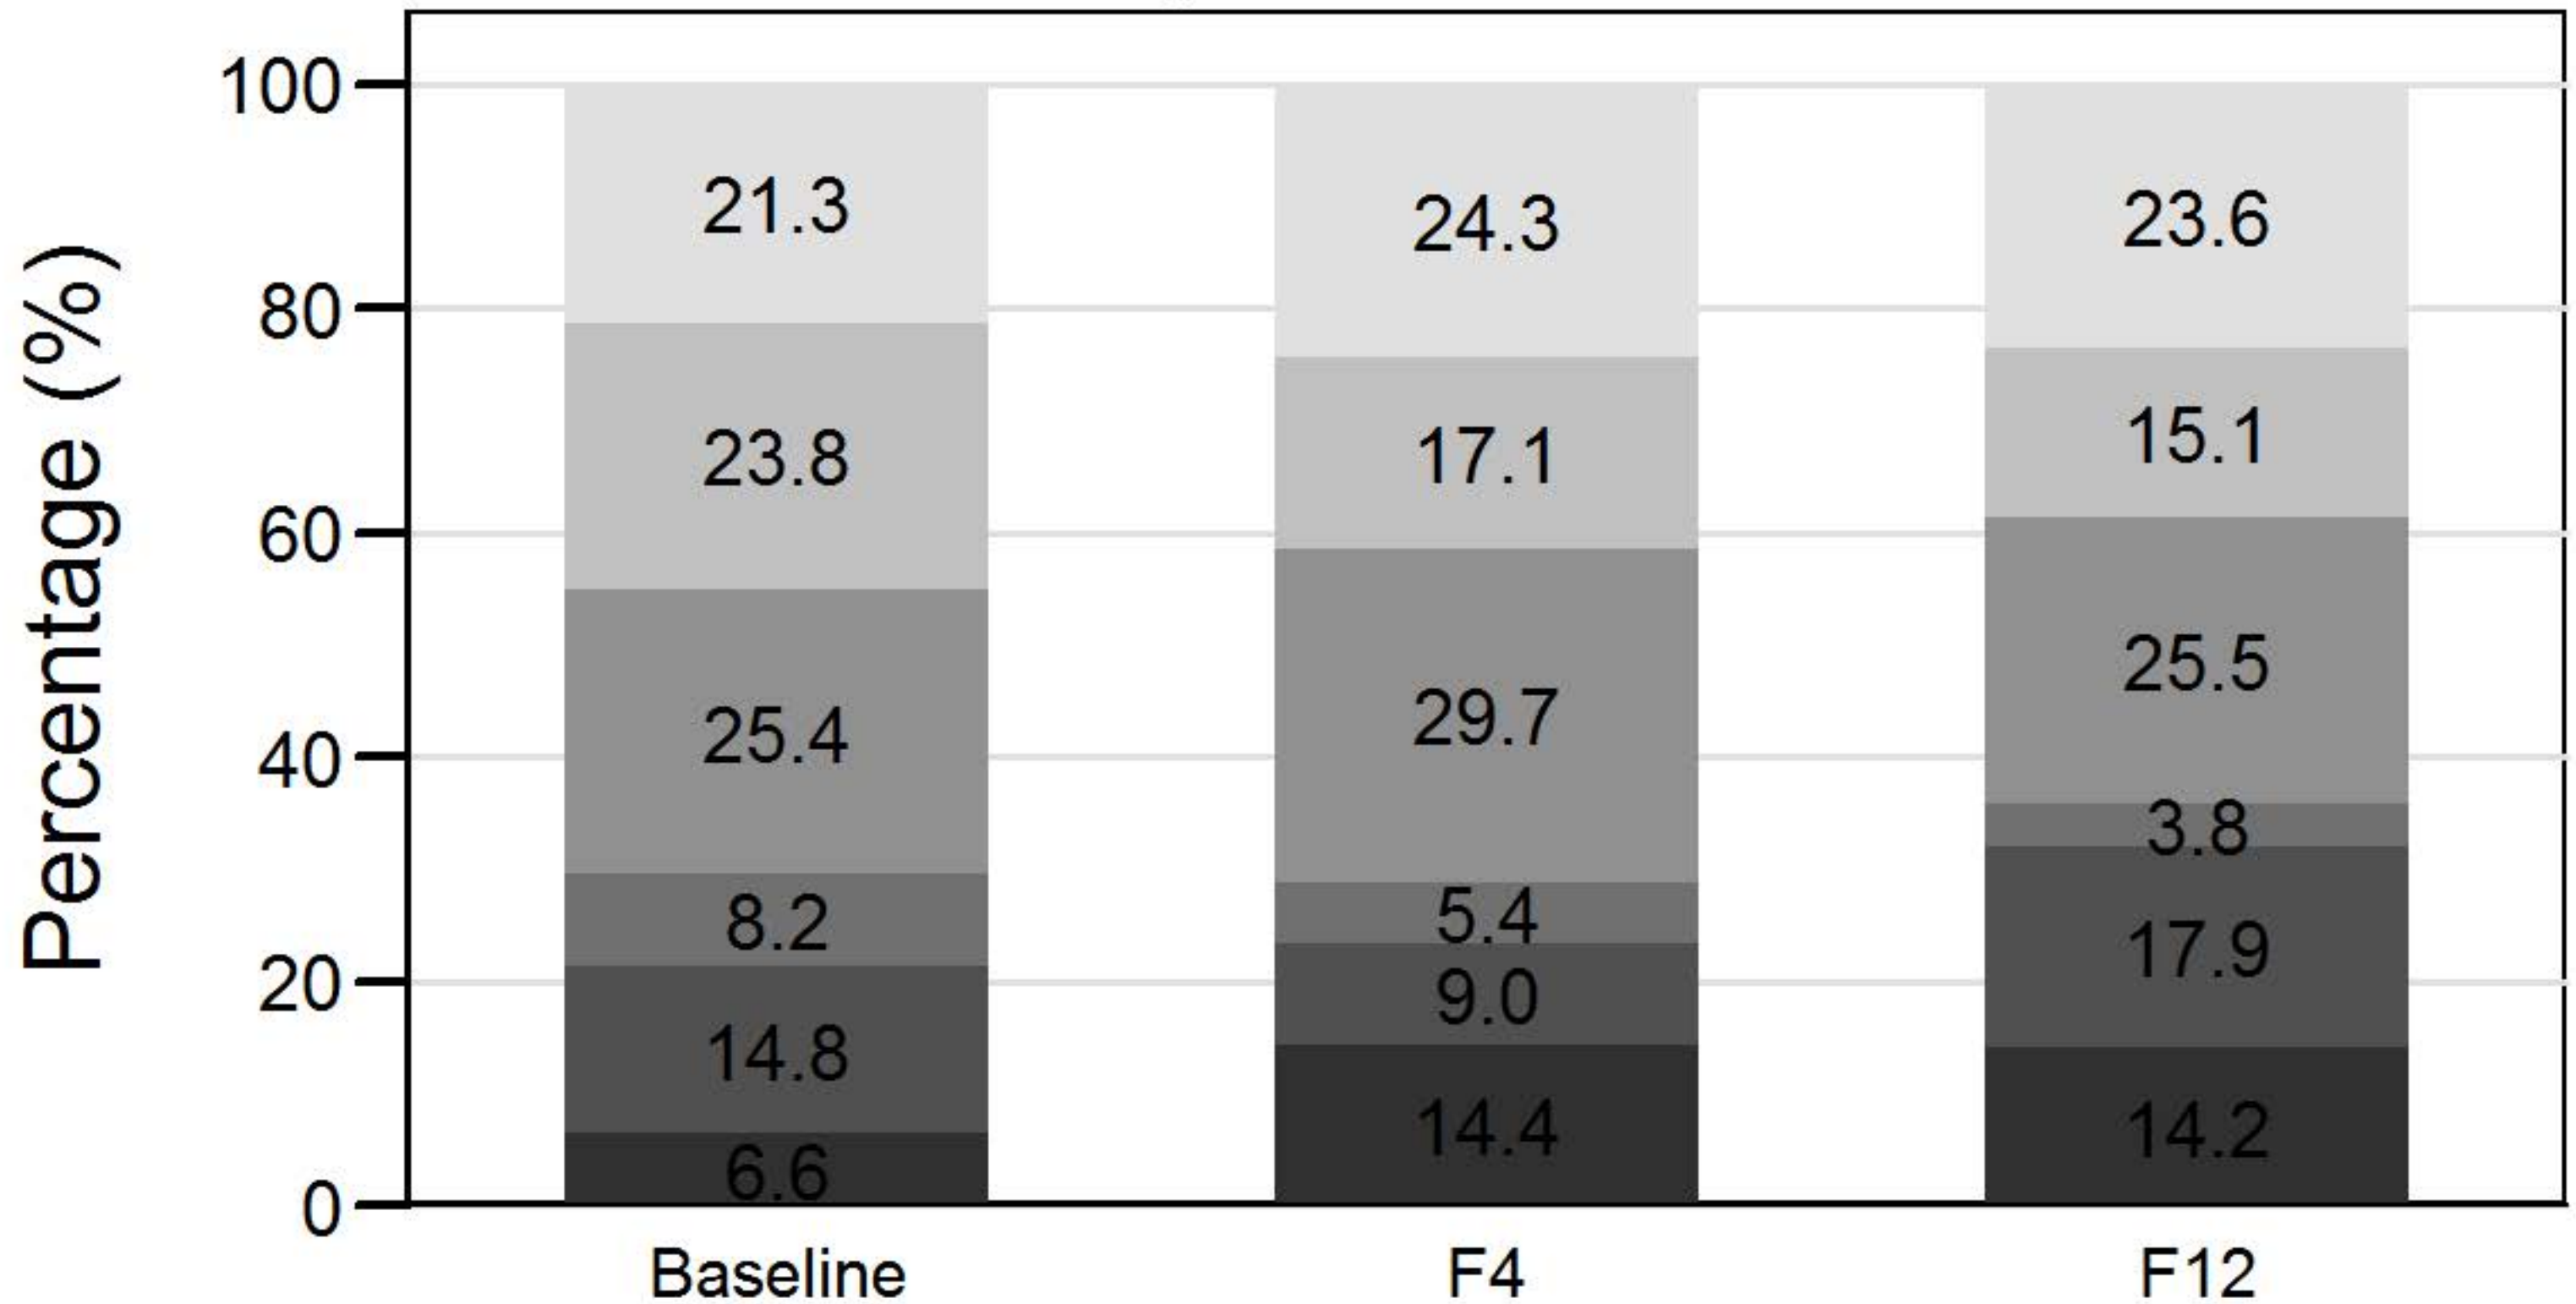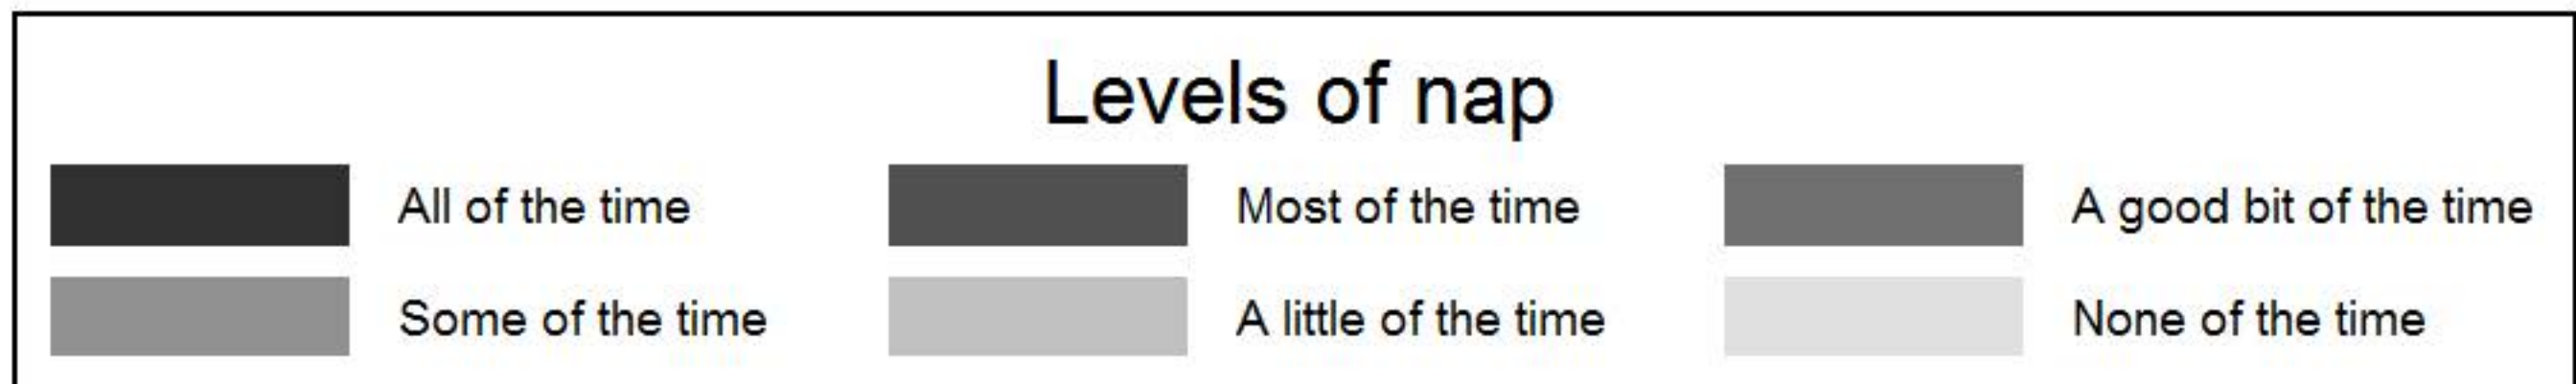

Percentages of nap levels at Baseline, F4 and F12  
in Nocturnal trial and 3x treatment

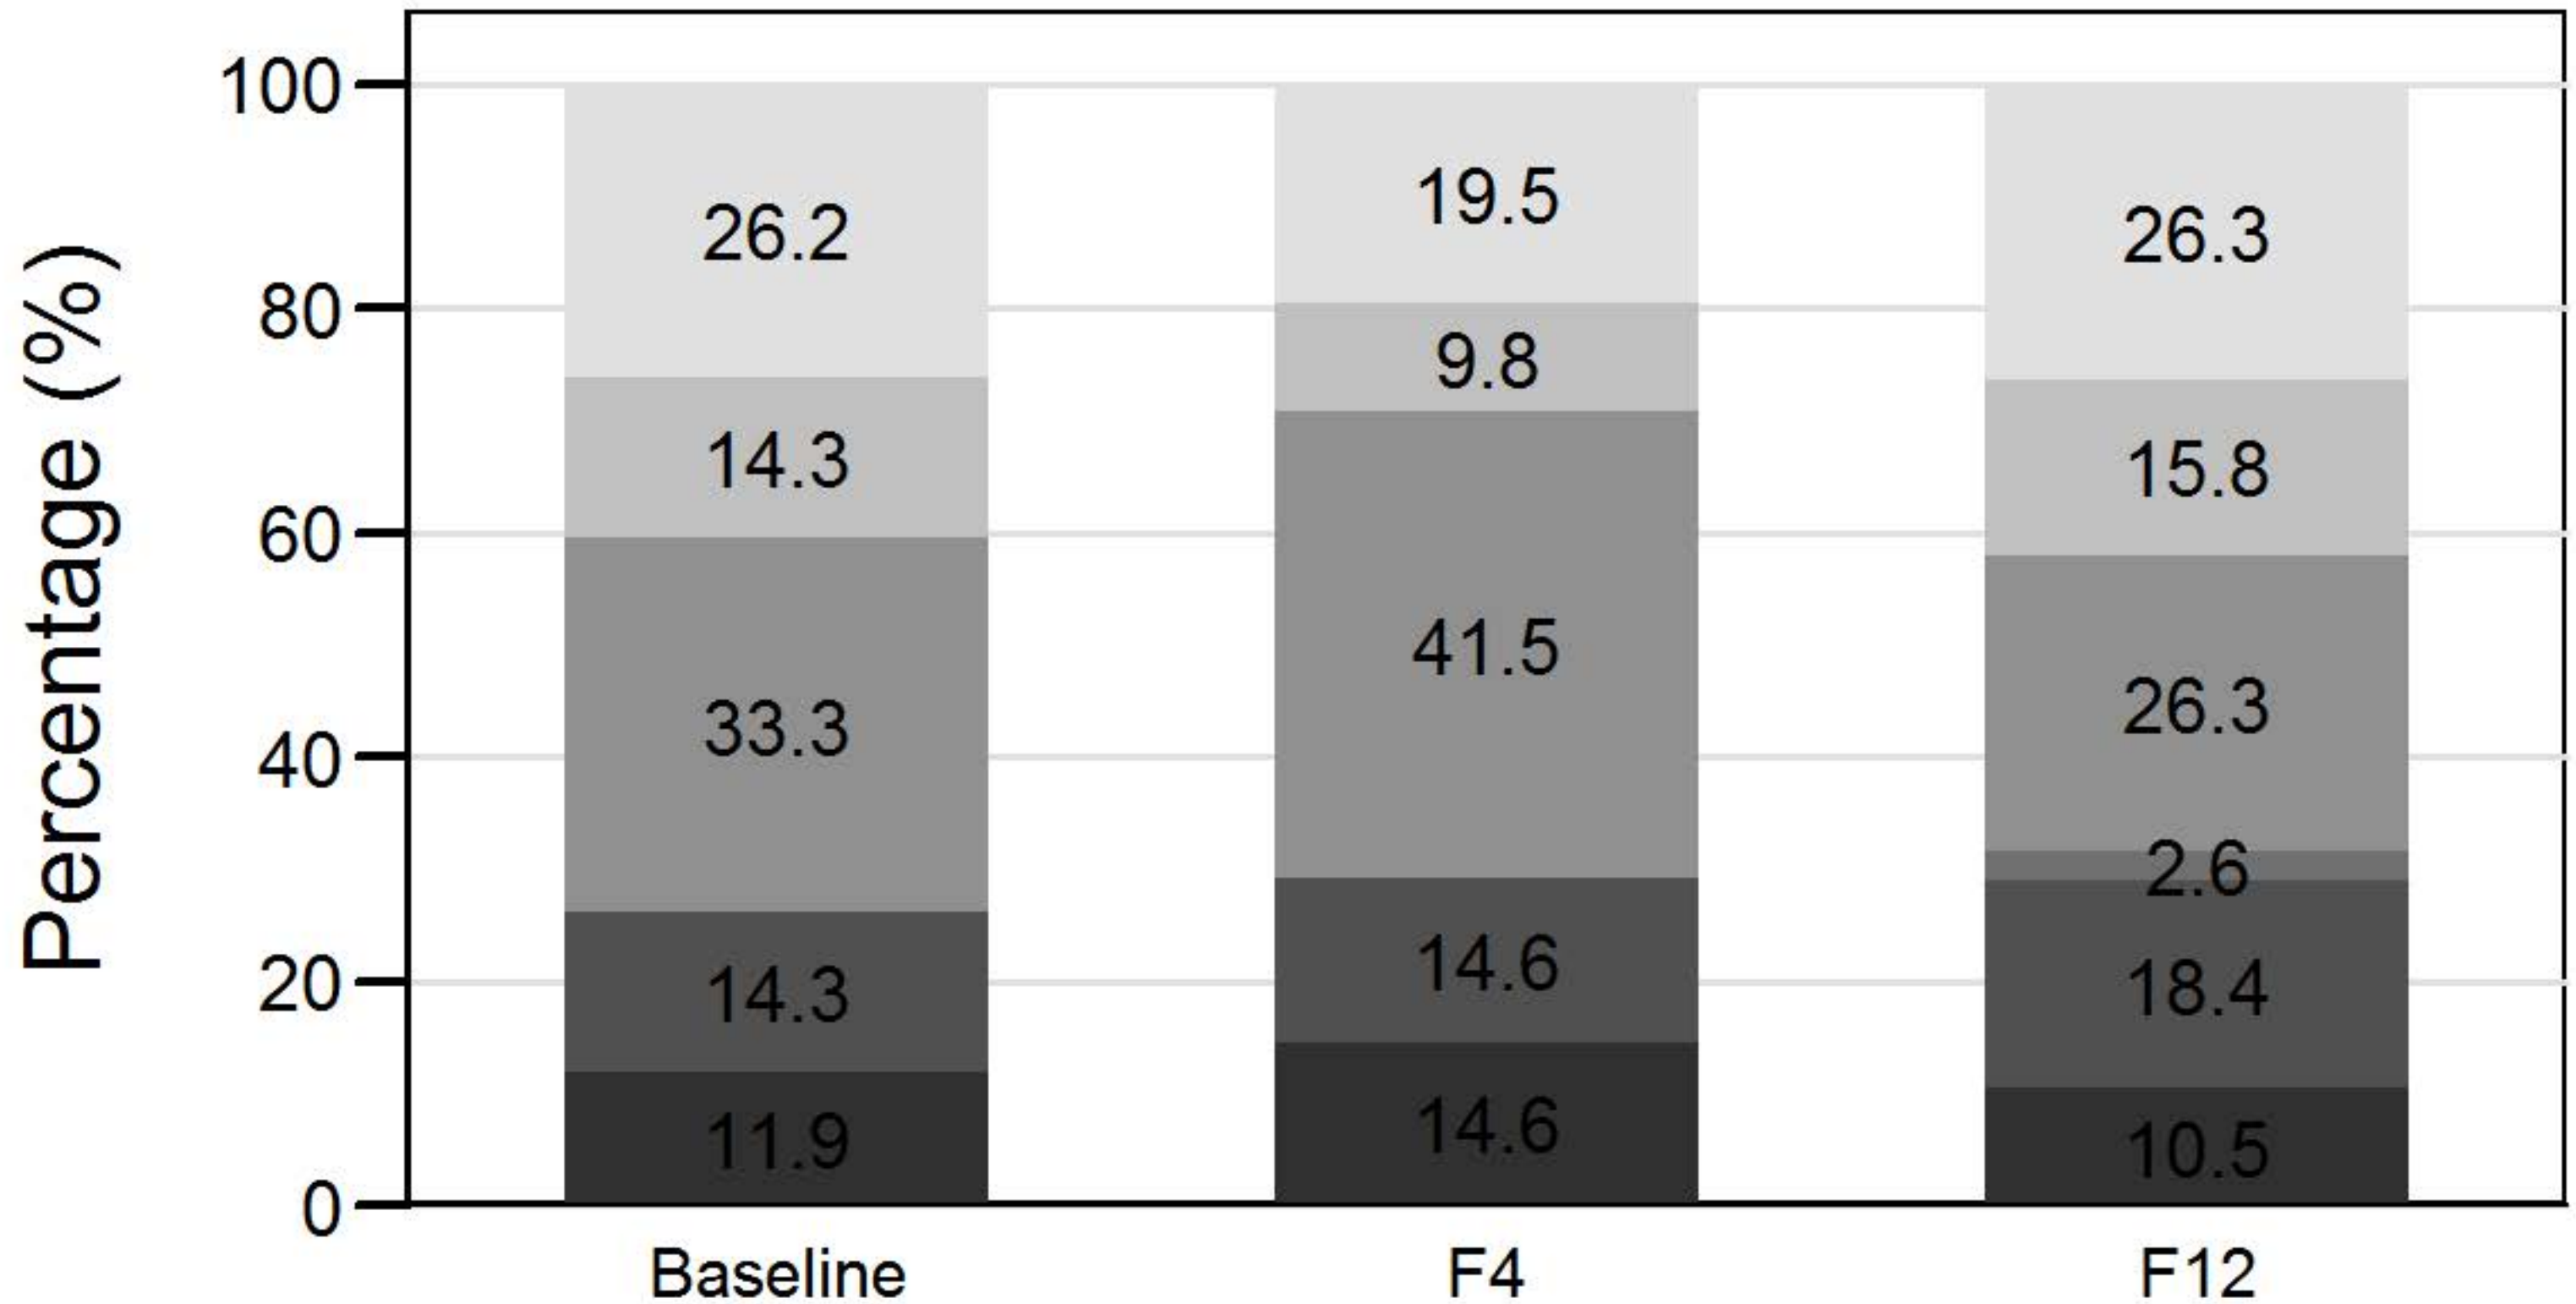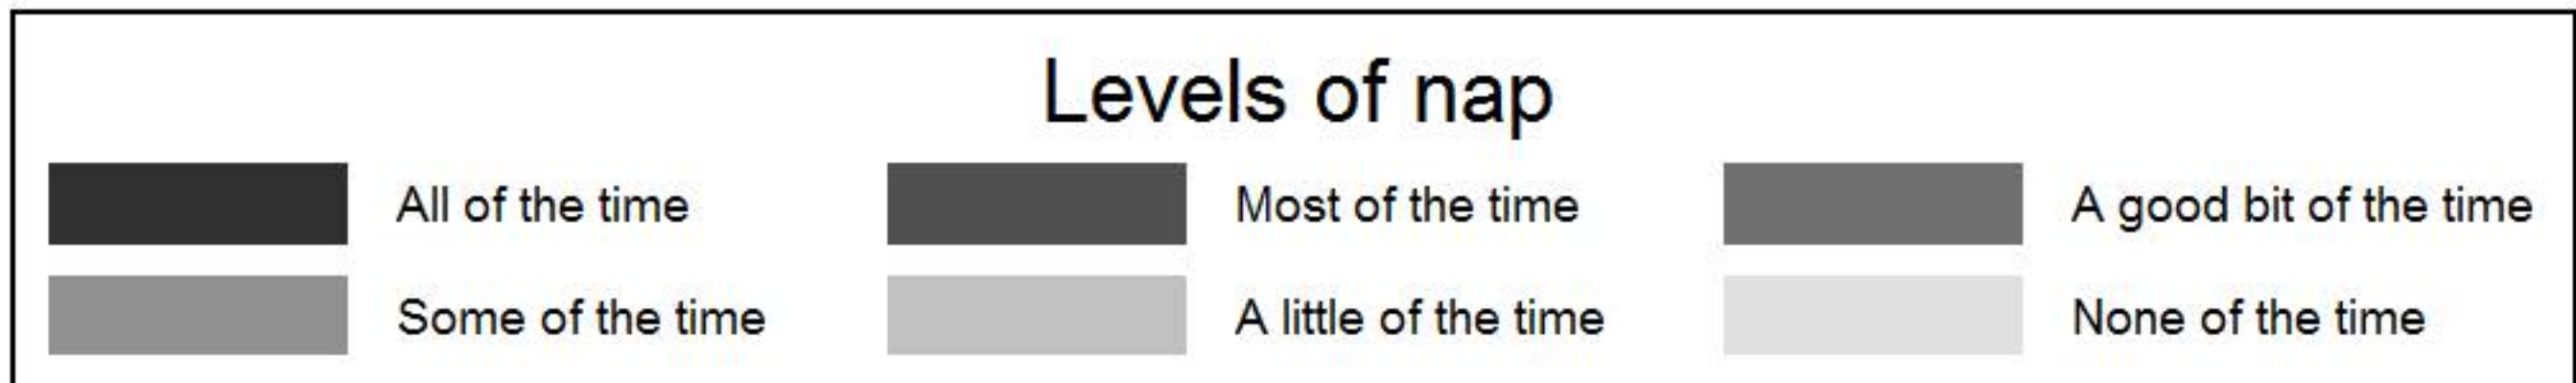

Percentages of nap levels at Baseline, F4 and F12  
in Nocturnal trial and 6x treatment

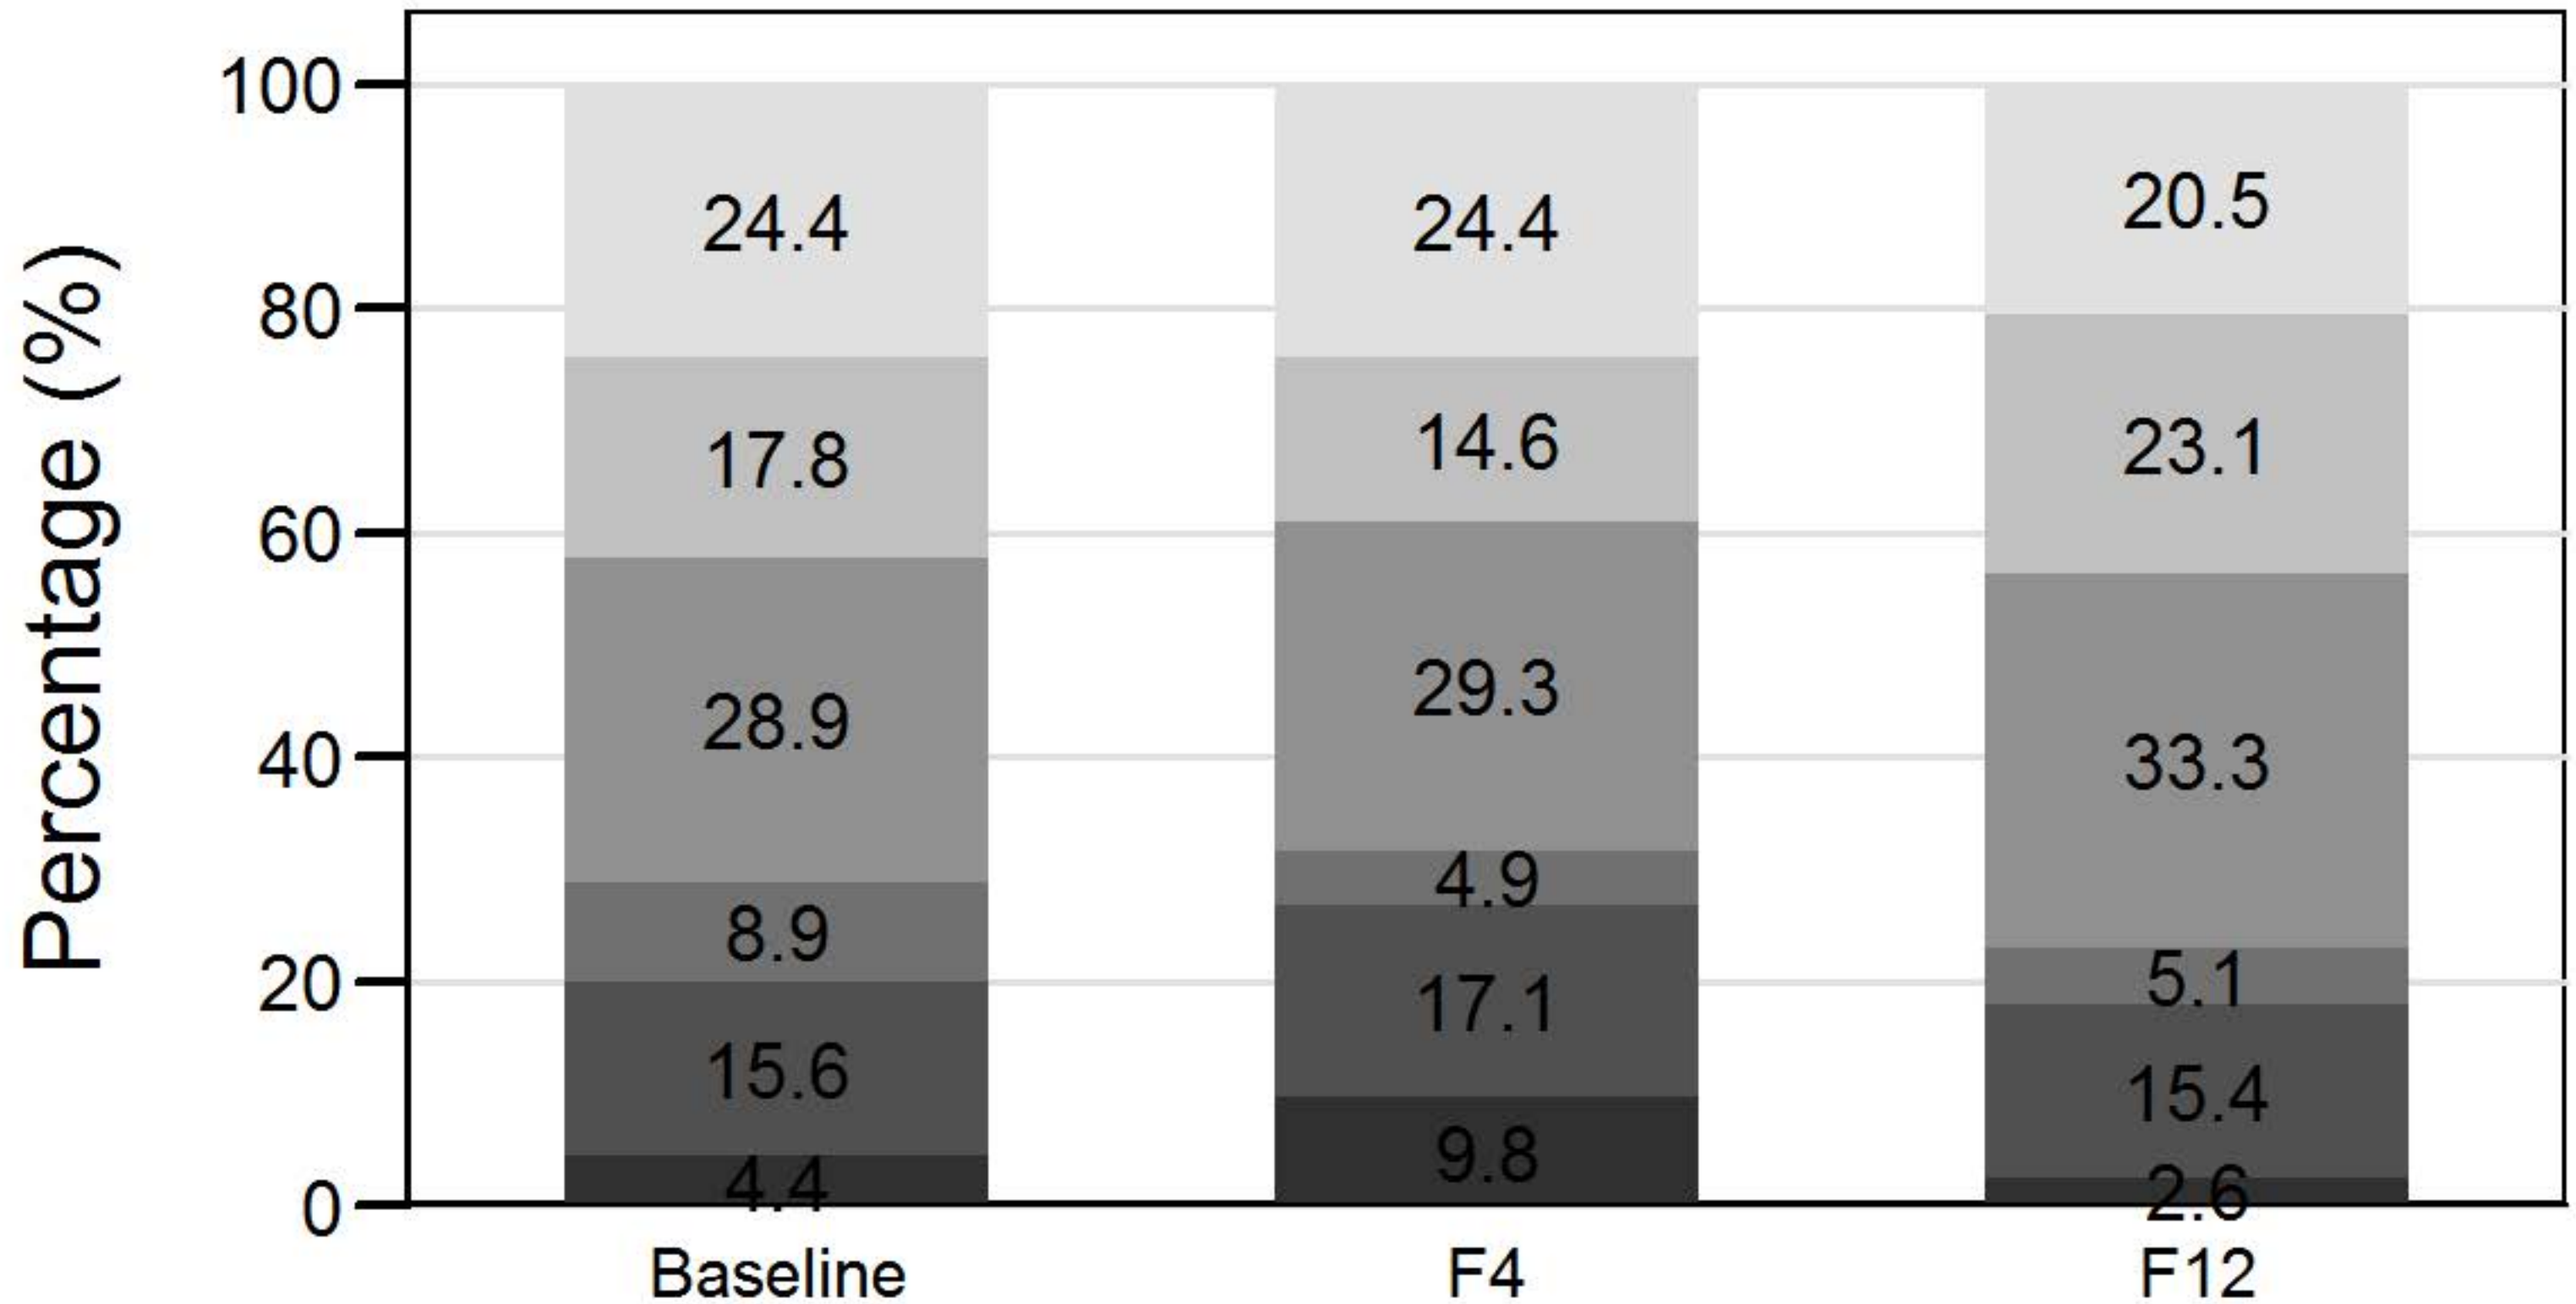

Percentages of snore levels at Baseline, F4 and F12 in Daily trial and 3x treatment

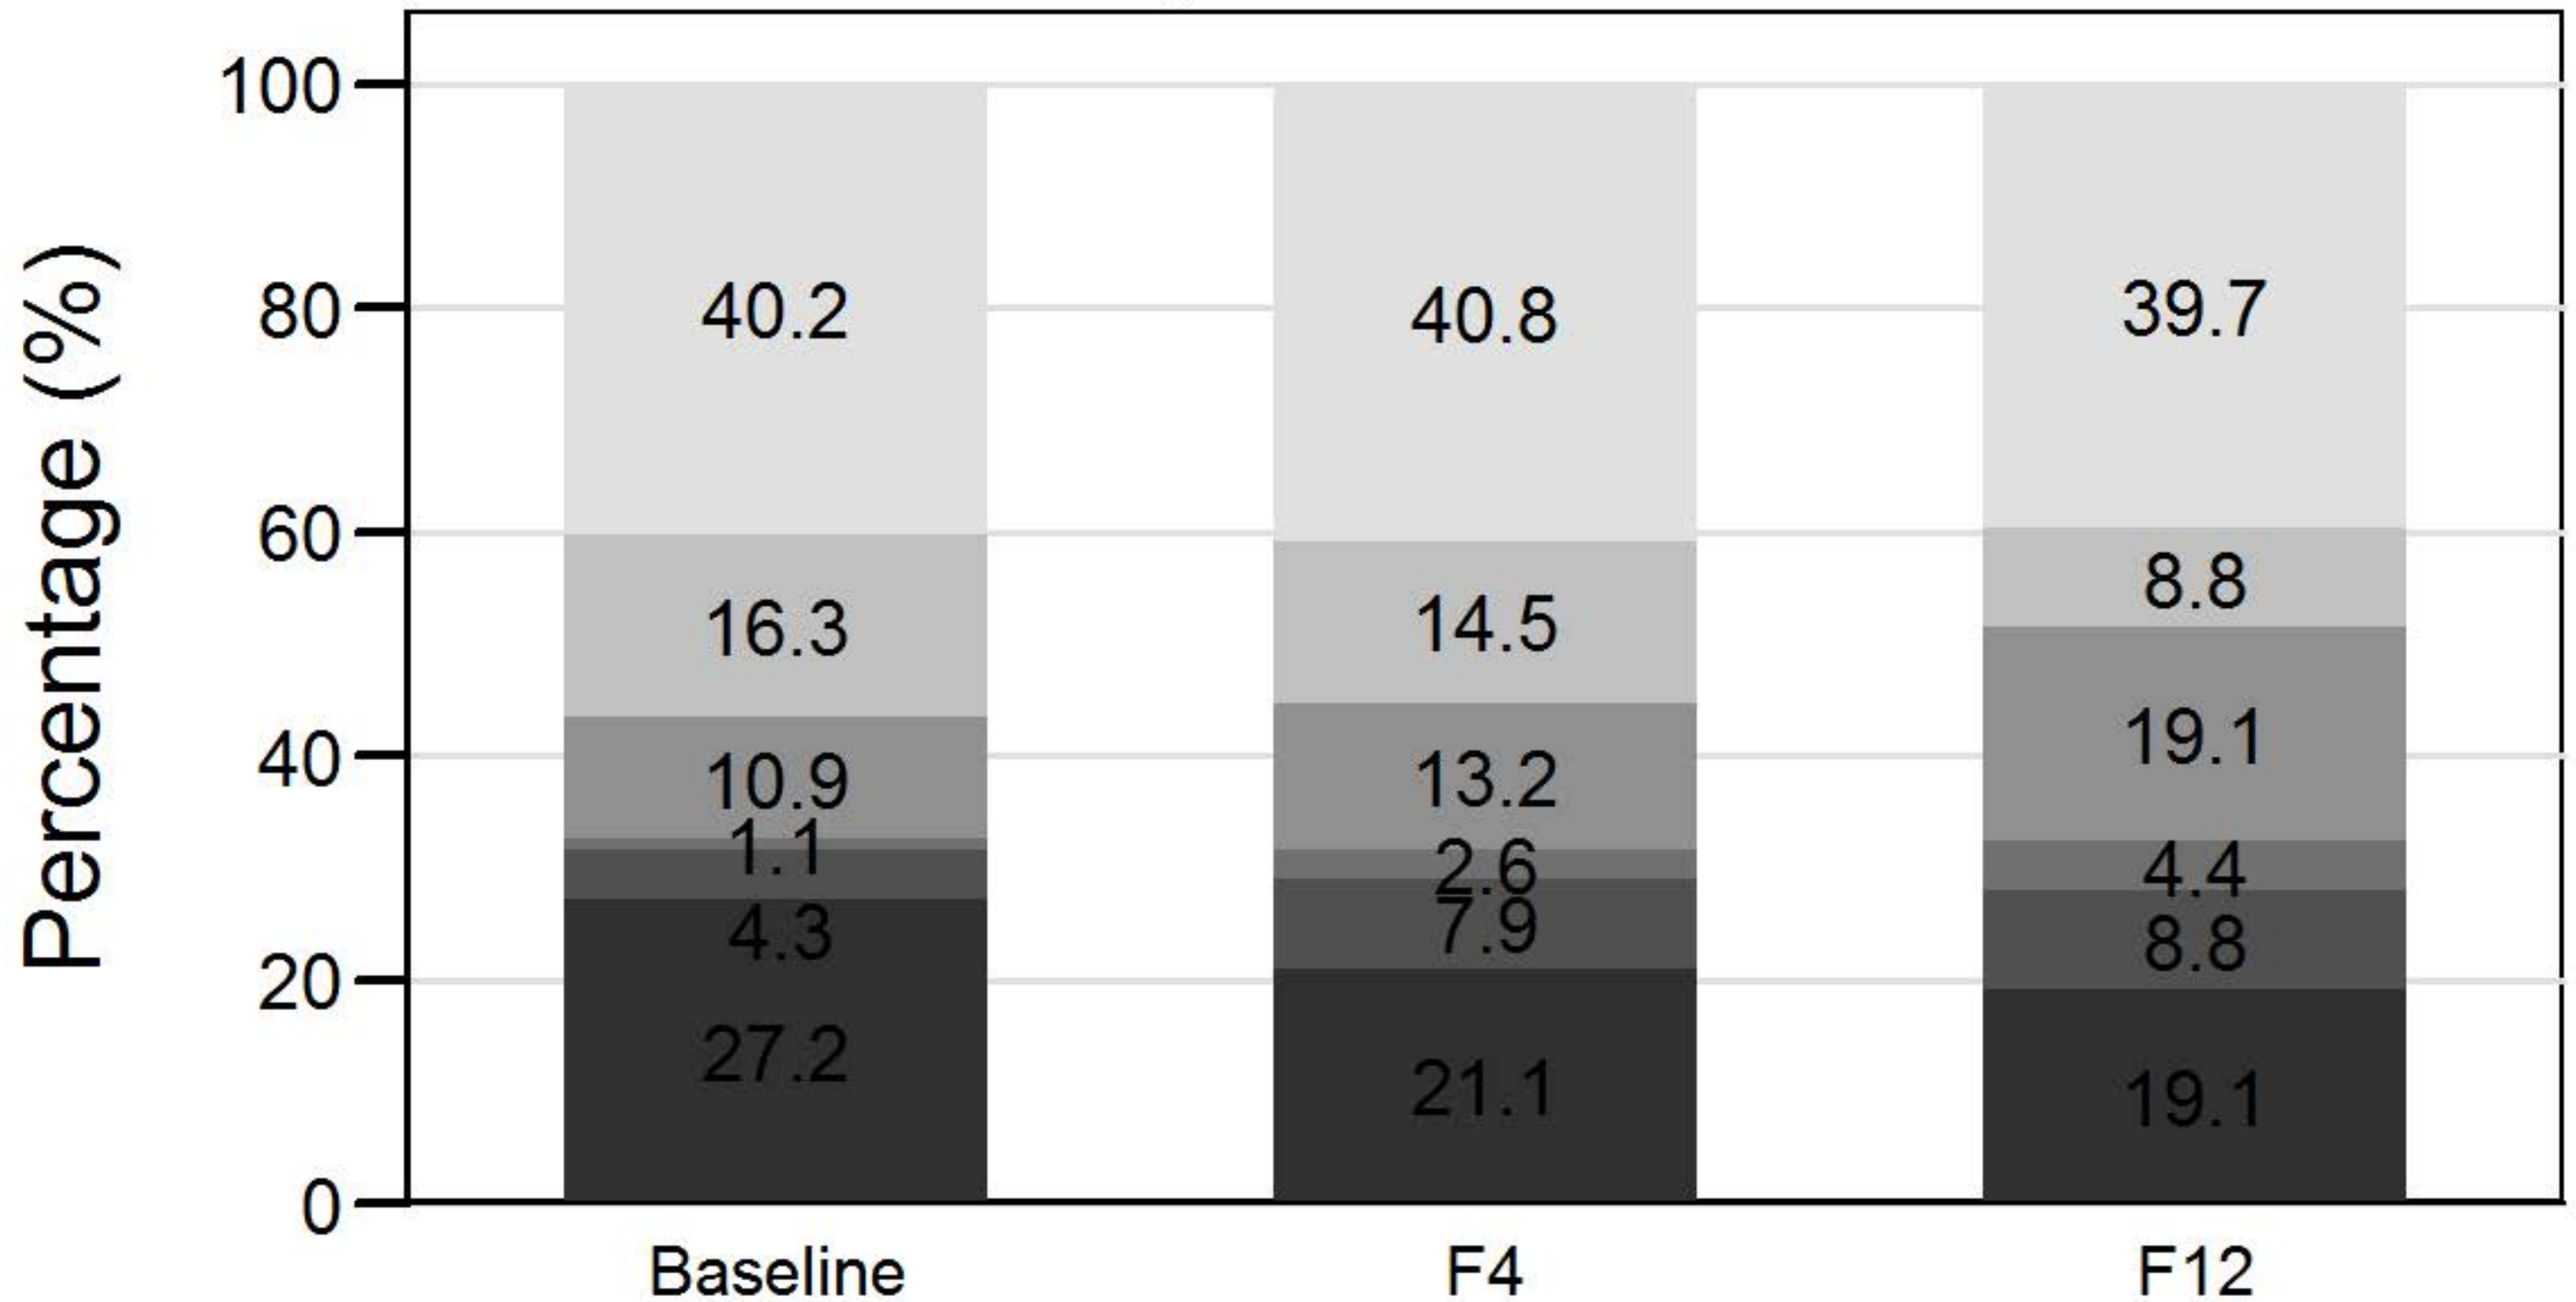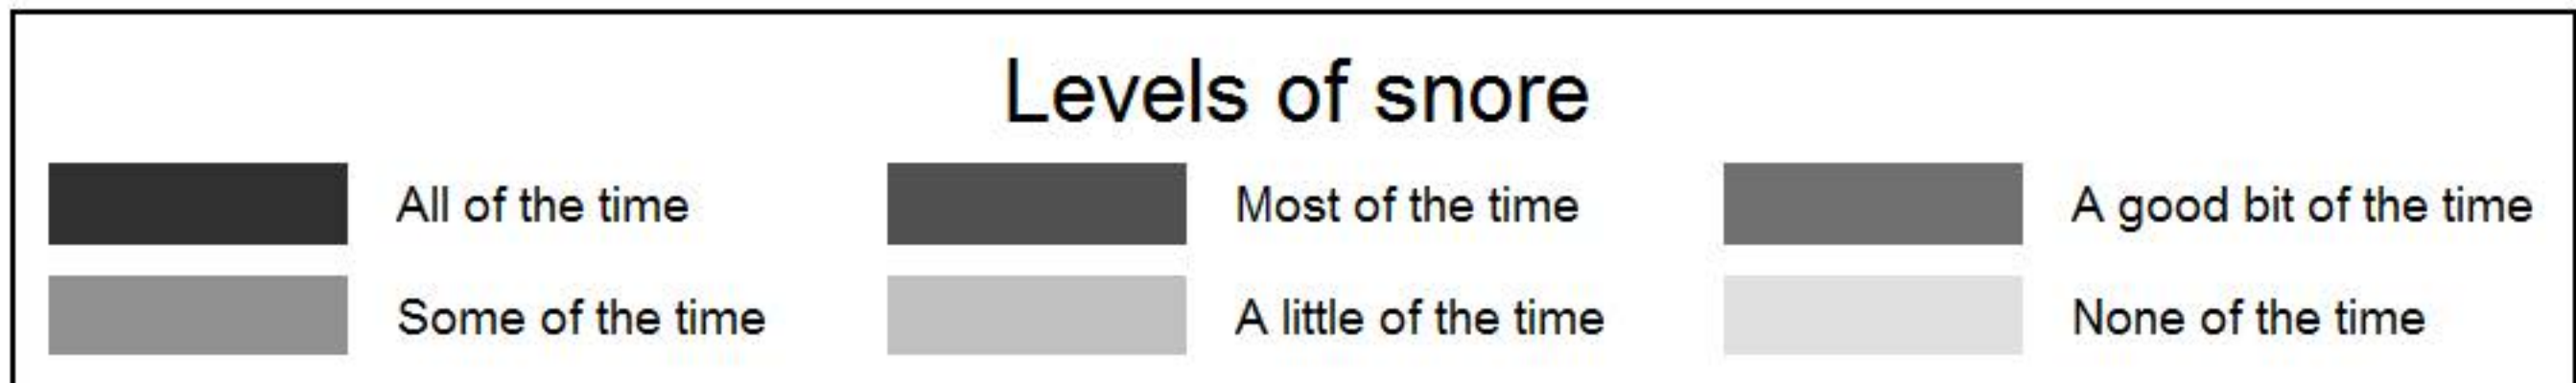

Percentages of snore levels at Baseline, F4 and F12 in Daily trial and 6x treatment

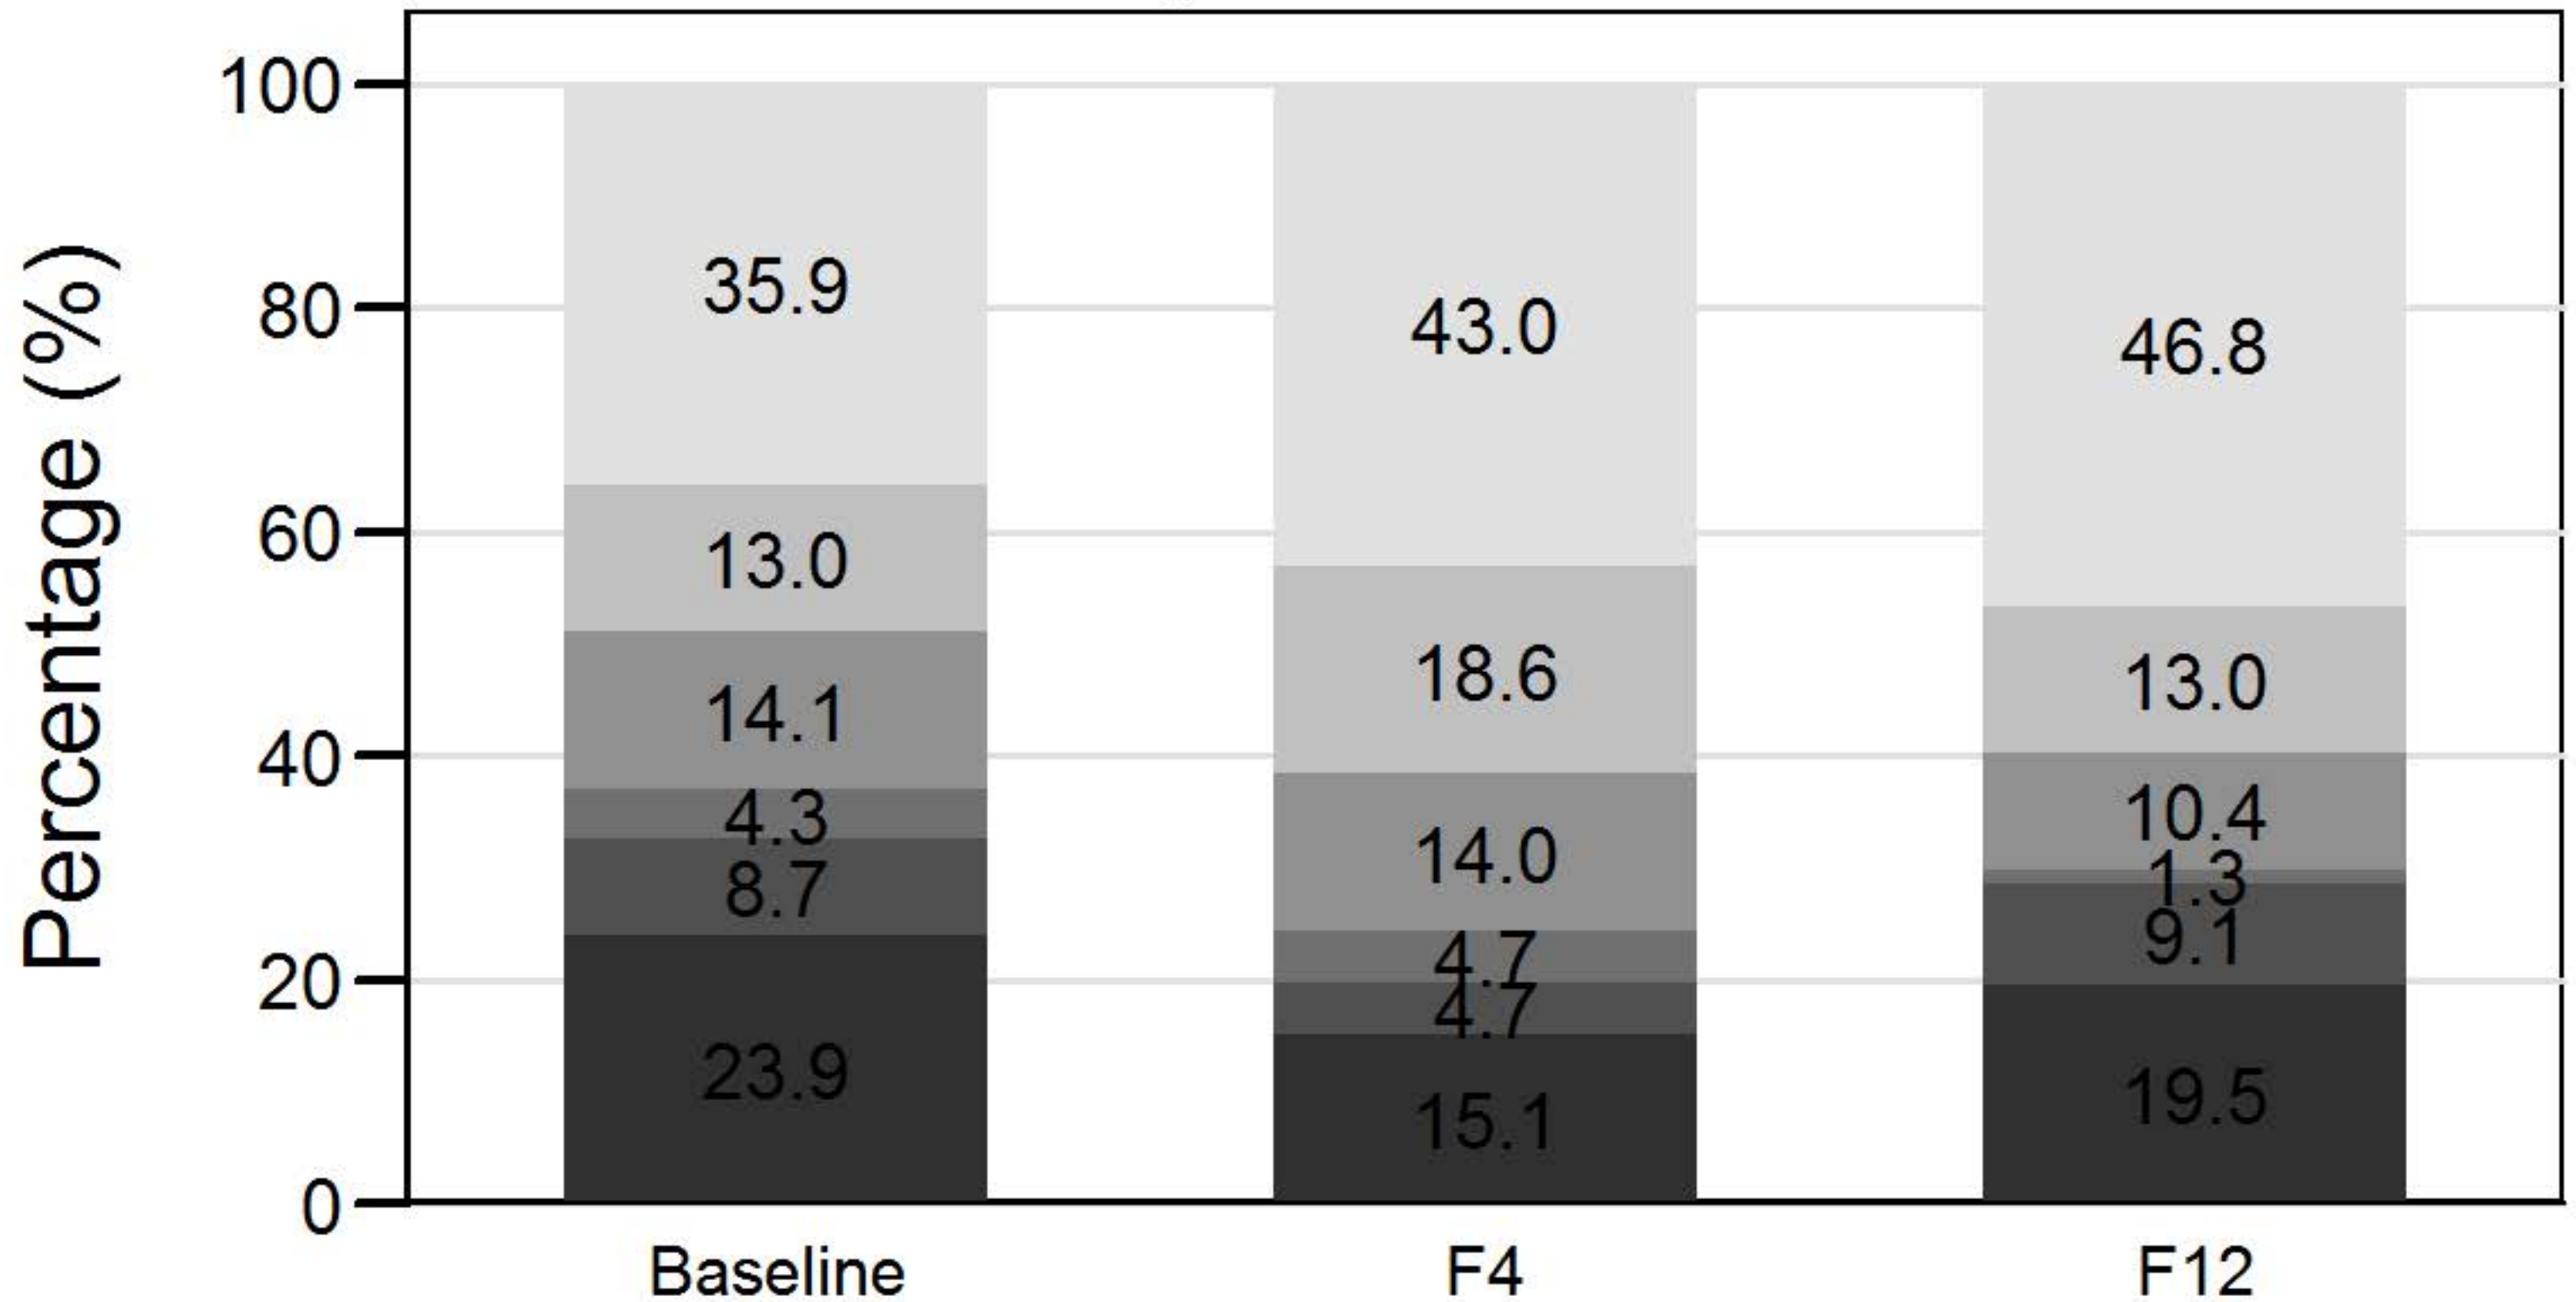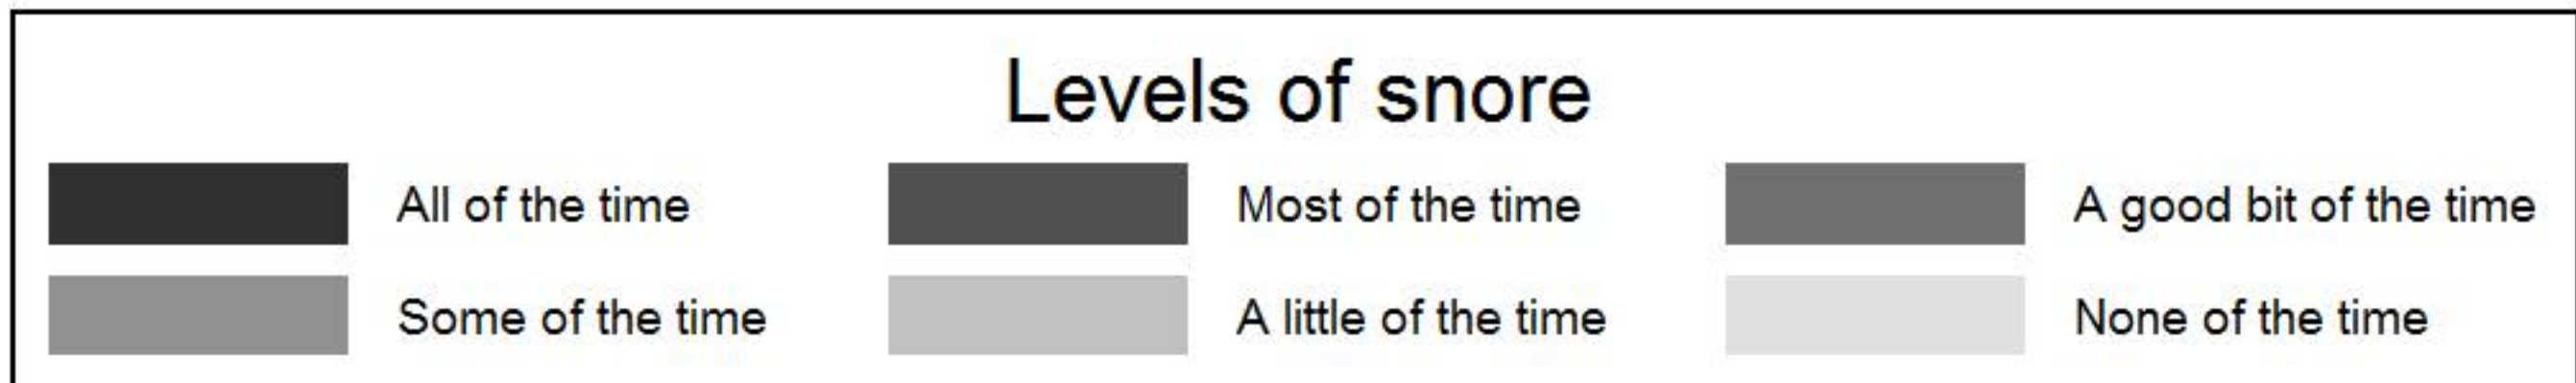

Percentages of snore levels at Baseline, F4 and F12 in Nocturnal trial and 3x treatment

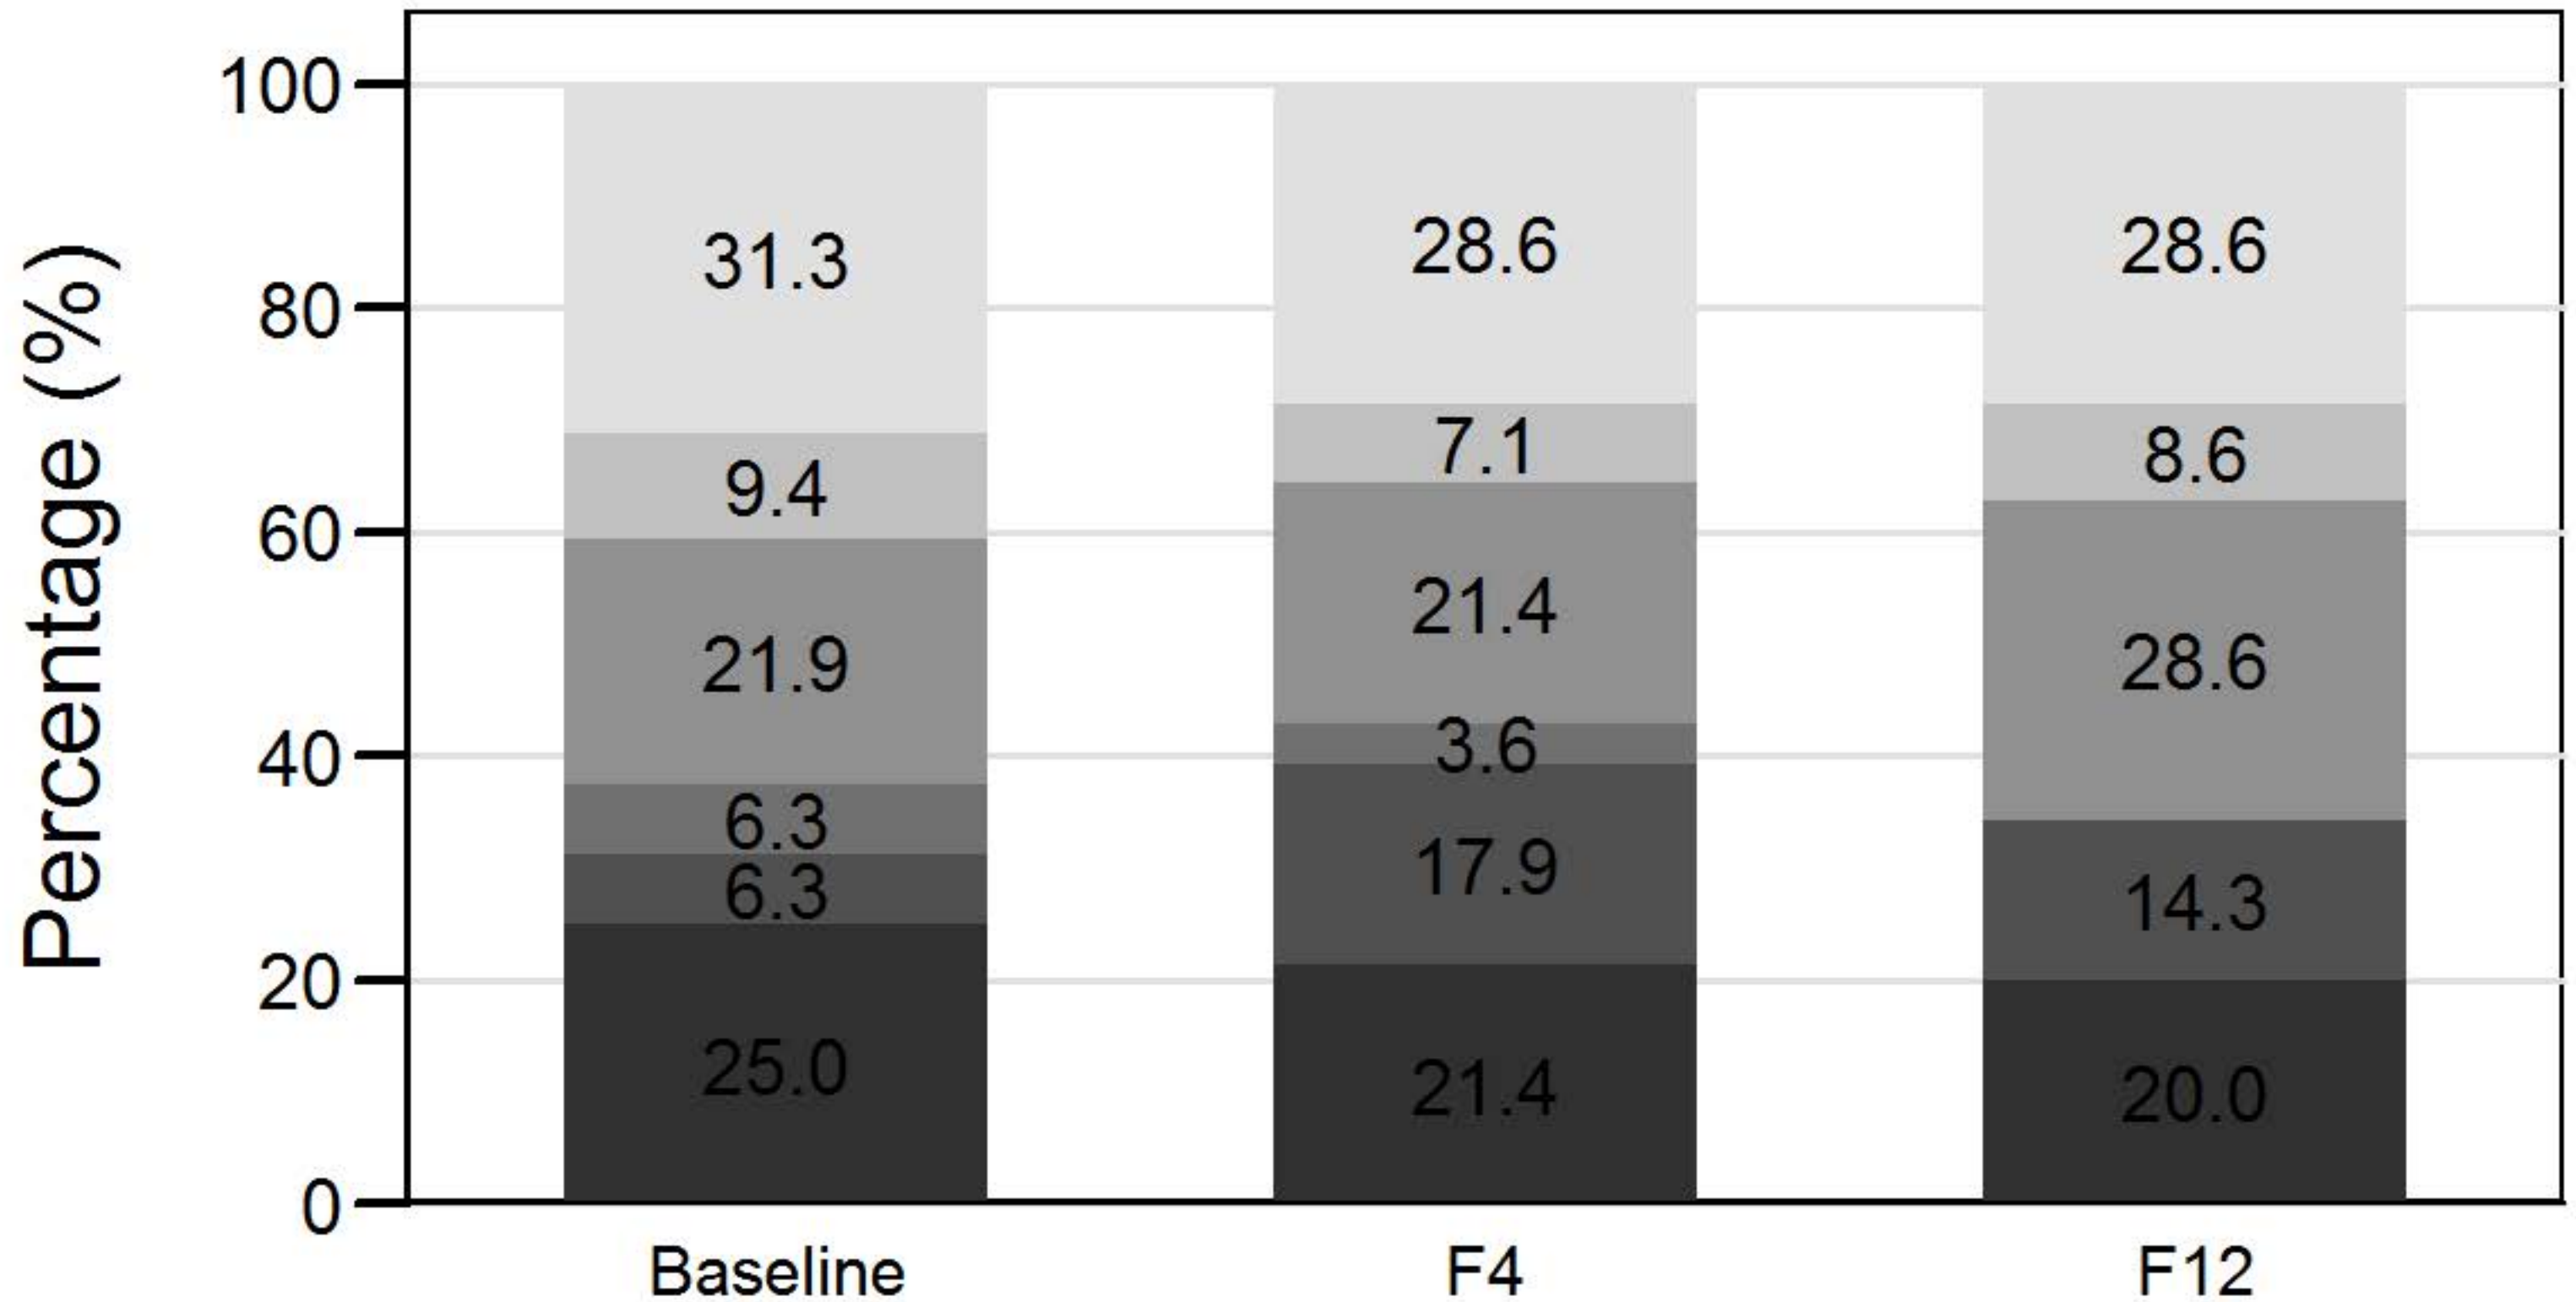



Percentages of snore levels at Baseline, F4 and F12 in Nocturnal trial and 6x treatment

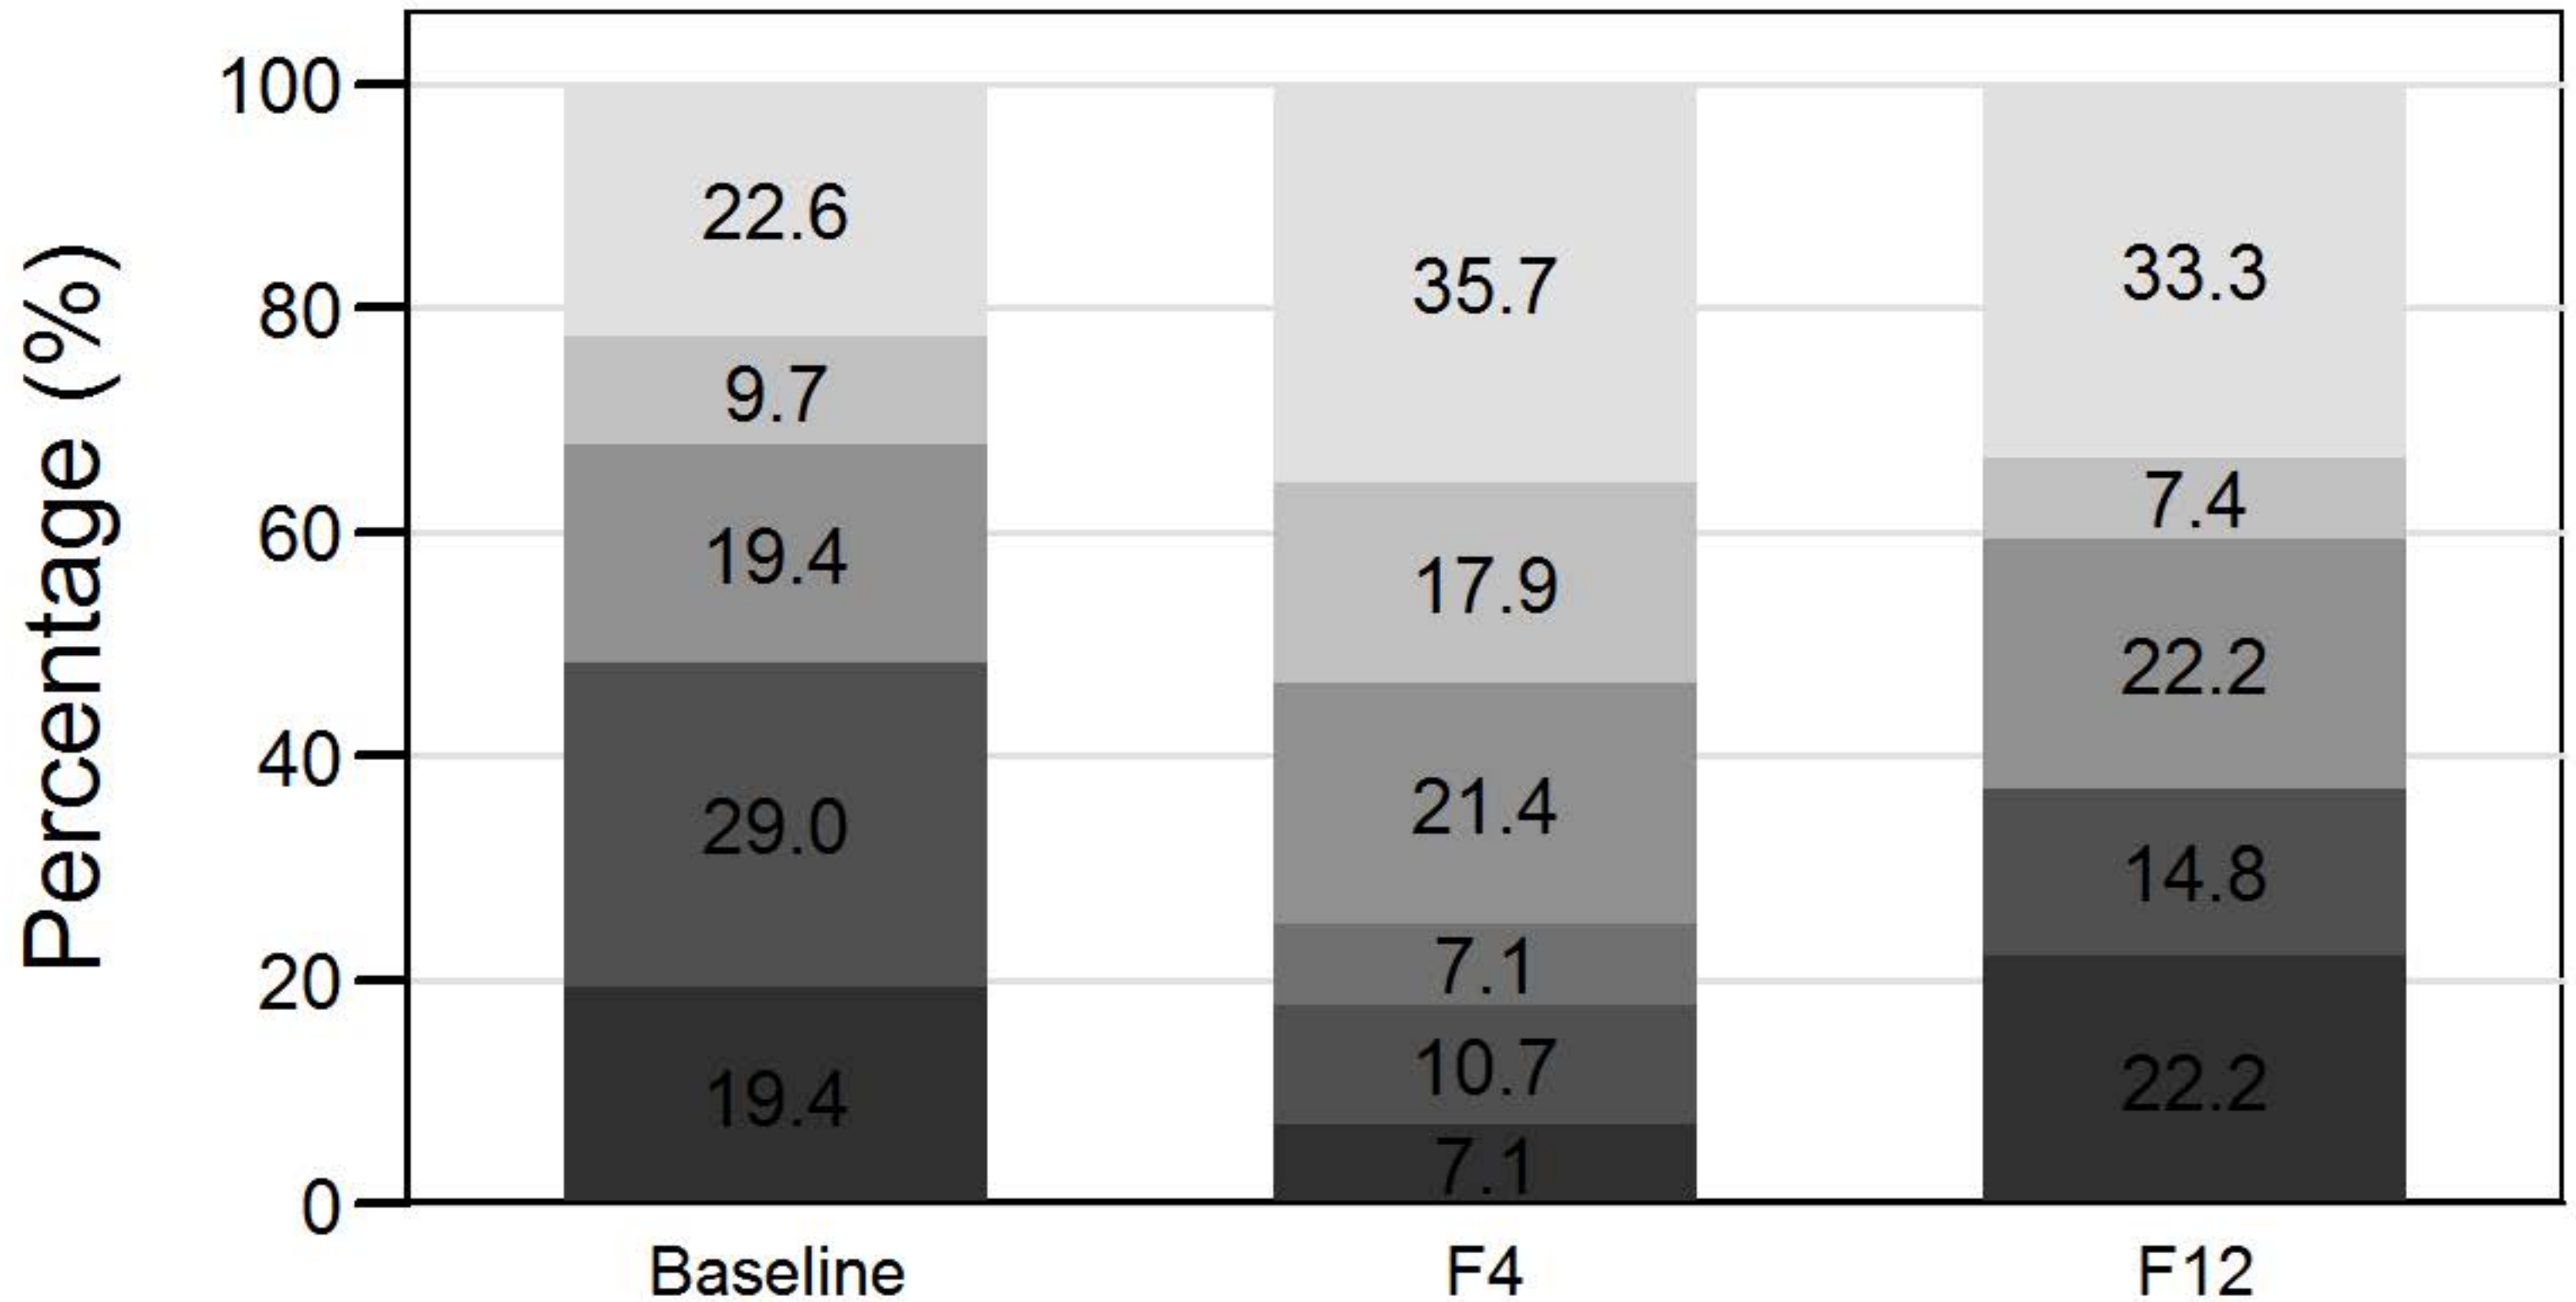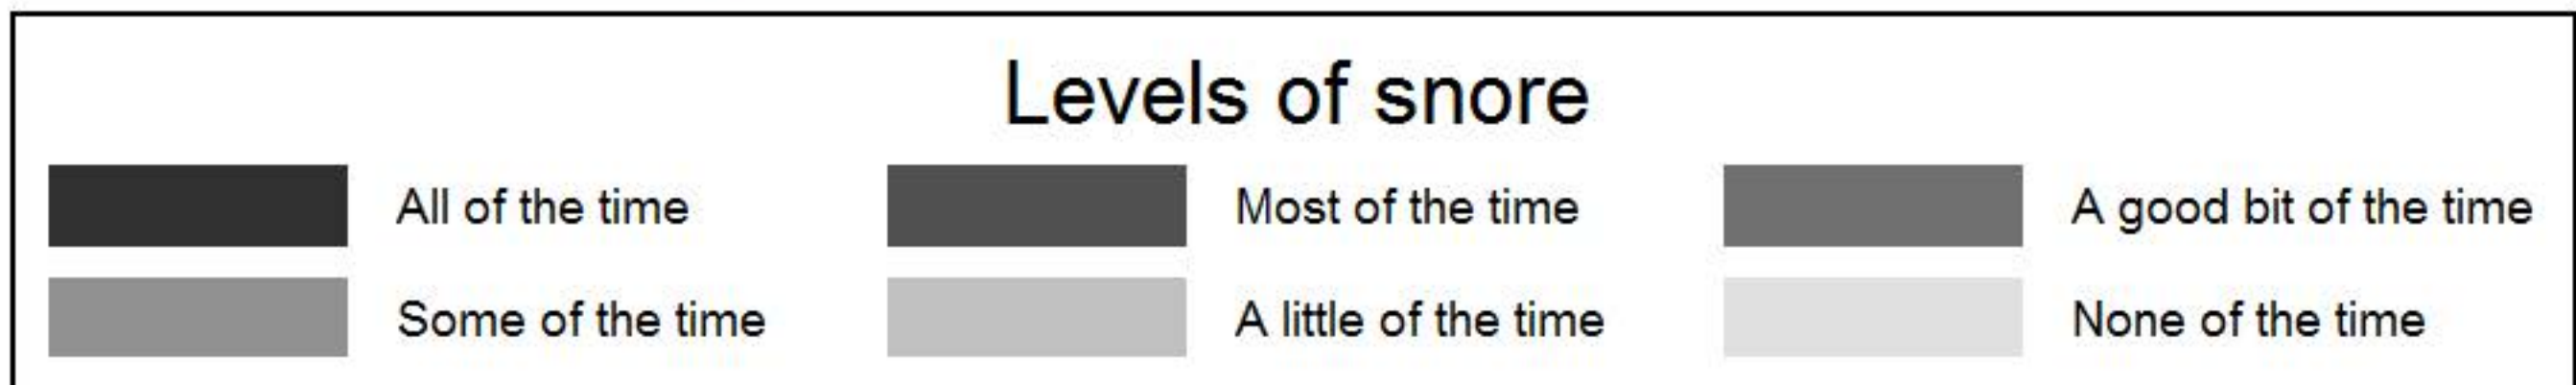

Supplement: supp_gfw062_gfw062supp.pdf [file supp_gfw062_gfw062supp.pdf]
